# Supplementary material for: CMTM4 is a subunit of the IL-17 receptor and mediates autoimmune pathology
Source: PubMed Central journal article supplement (PMC9663306; doi:10.1038/s41590-022-01325-9), 2022-10-21

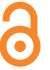

---

# **CMTM4 is a subunit of the IL-17 receptor and mediates autoimmune pathology**

---

In the format provided by the authors and unedited

**Fig. 5a - Gating strategy**

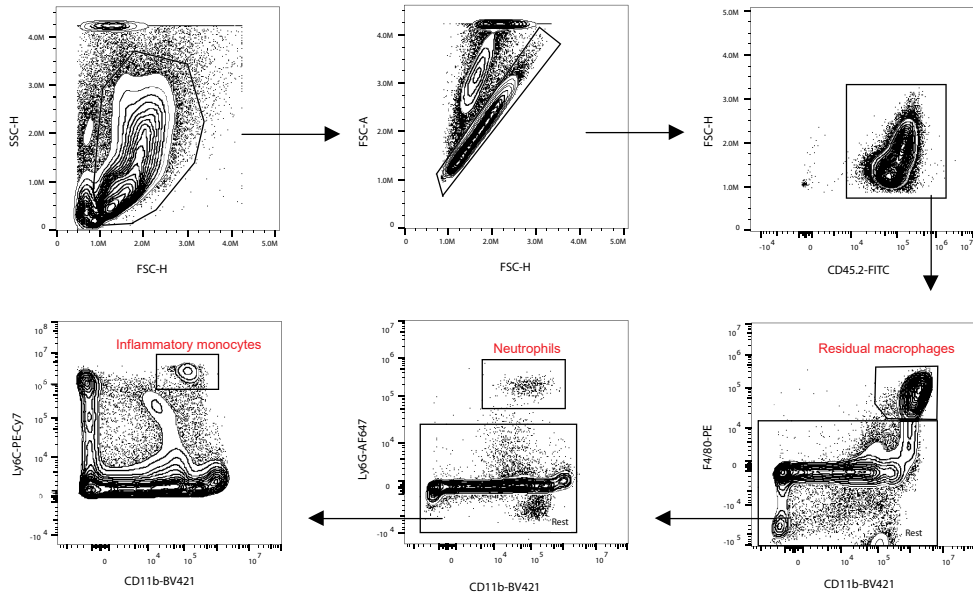

**Fig. 7d - Gating strategy**

**B cells**

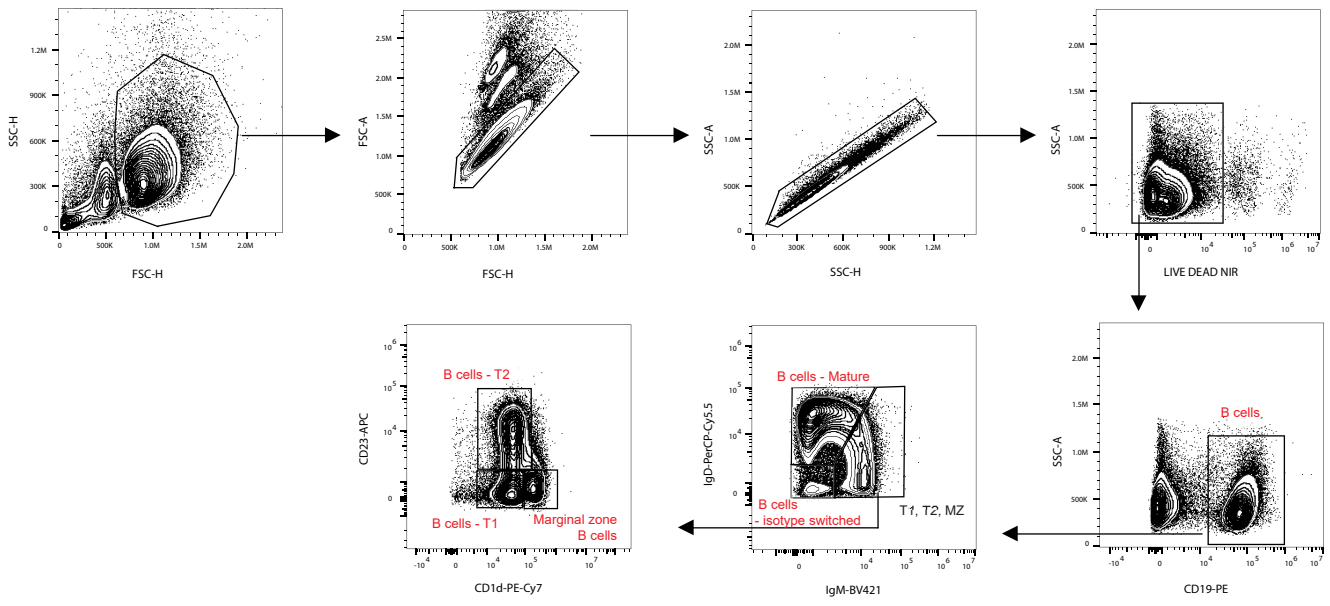

**Monocytes - Macrophages**

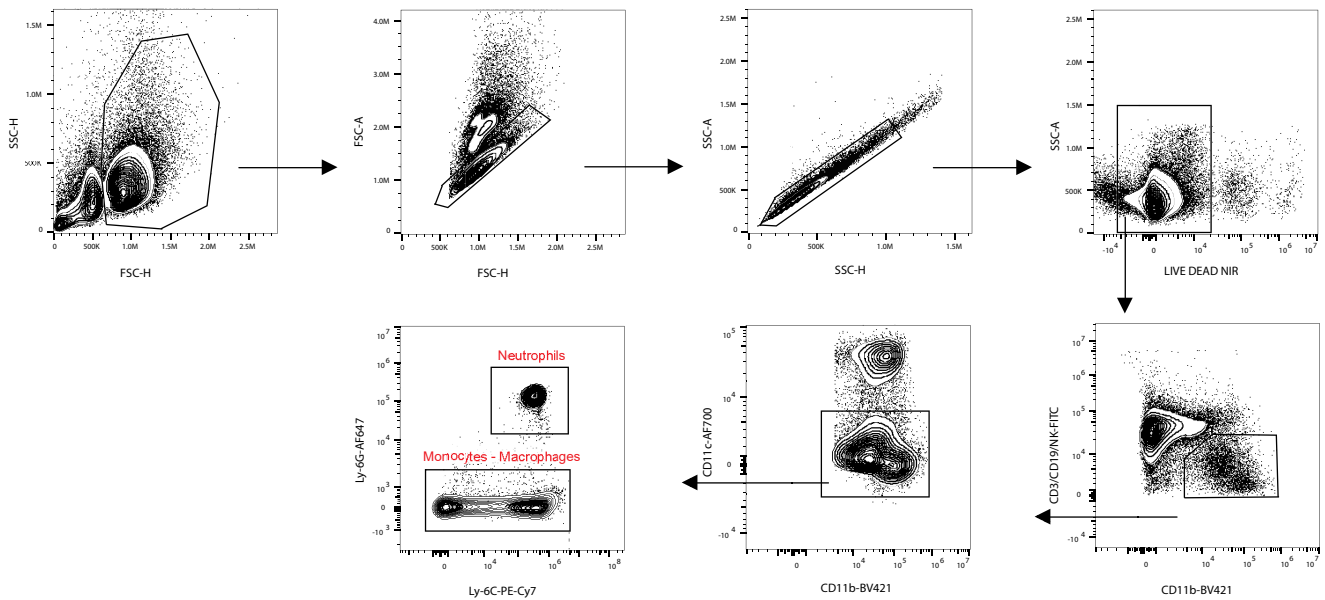

**Fig. 7d - Gating strategy**

**CD8<sup>+</sup> T cells**

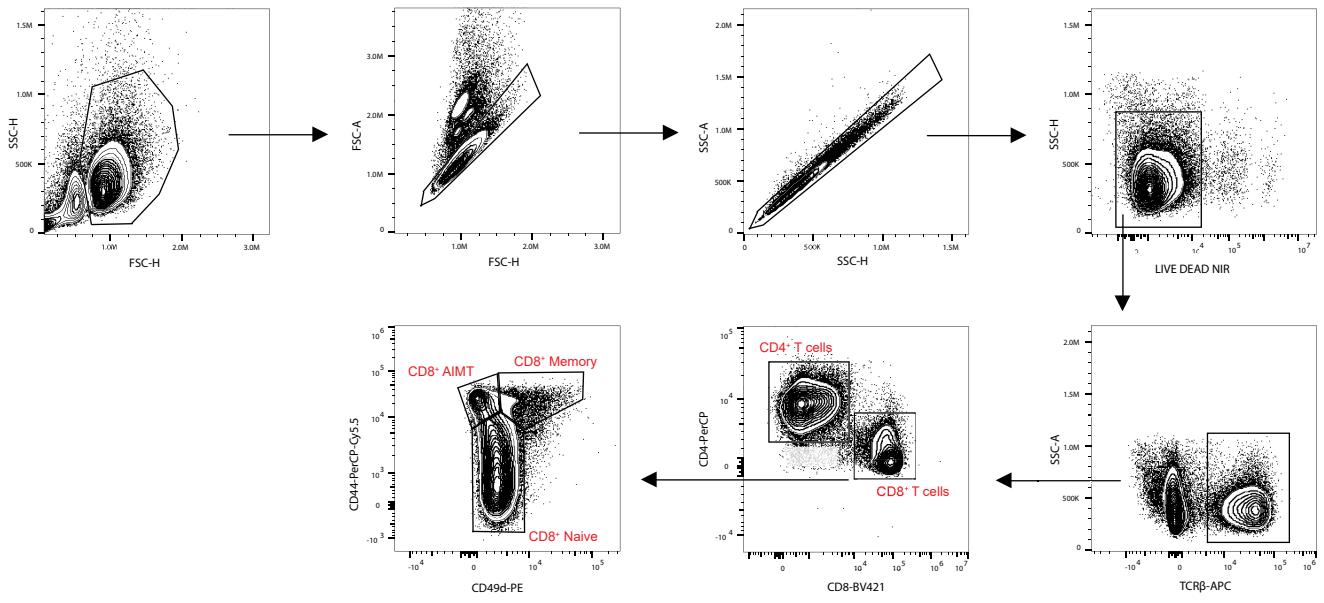

**CD4<sup>+</sup> T cells**

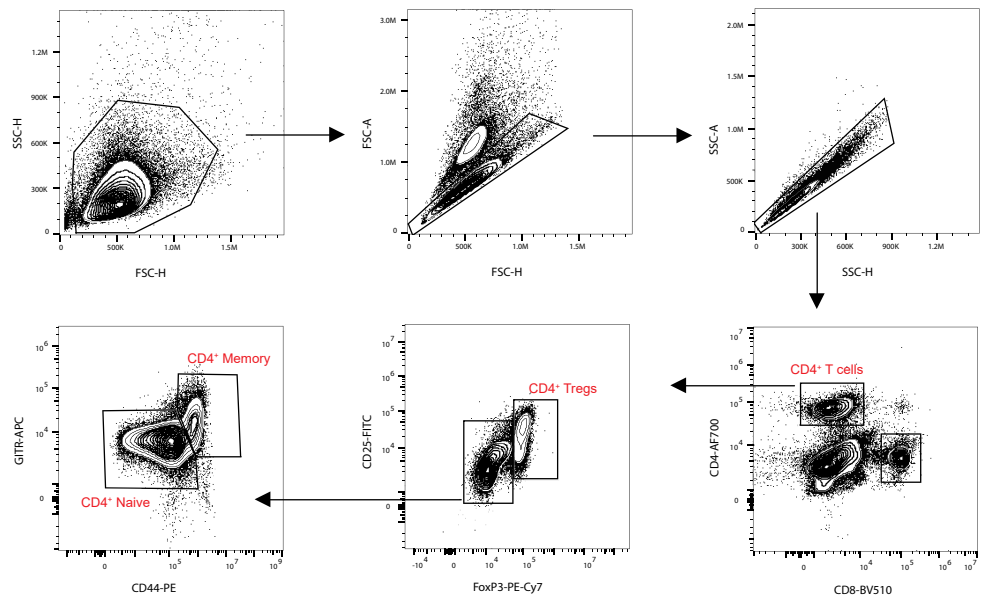

Supplement: 41590_2022_1325_MOESM1_ESM.pdf [file 41590_2022_1325_MOESM1_ESM.pdf]
