# Supplementary material for: CMTM4 is a subunit of the IL-17 receptor and mediates autoimmune pathology
Source: PubMed Central journal article supplement (PMC9663306; doi:10.1038/s41590-022-01325-9), 2022-10-21

**Fig. 3a**

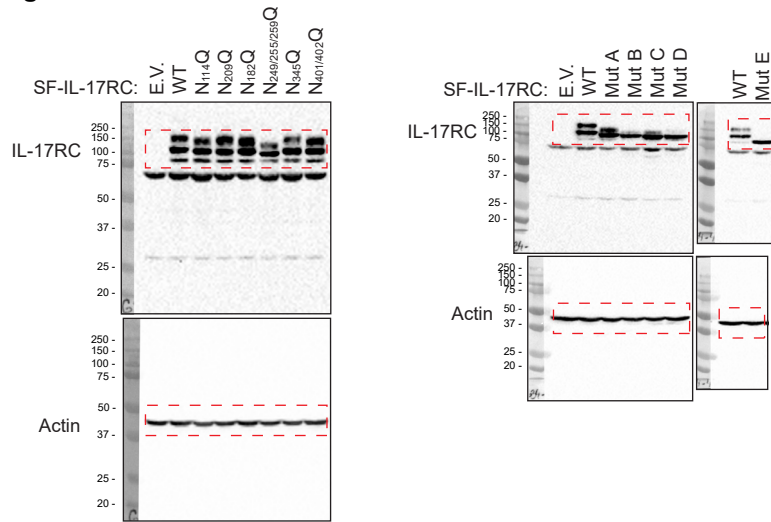

**Fig. 3c**

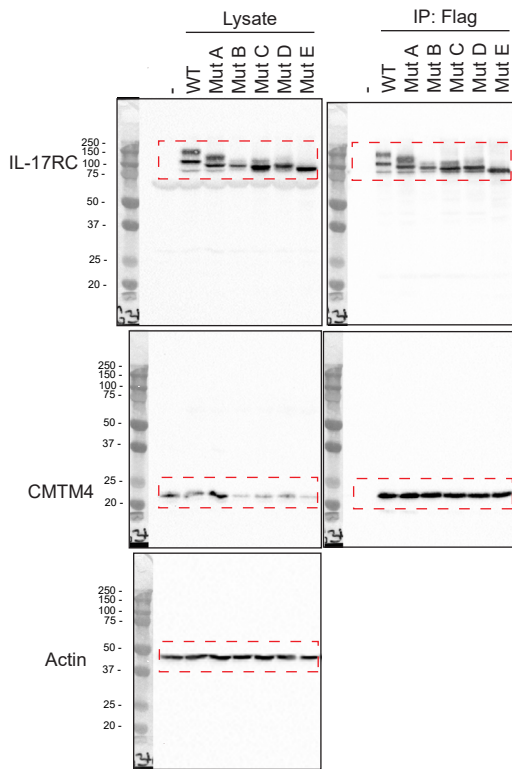

**Fig. 3d**

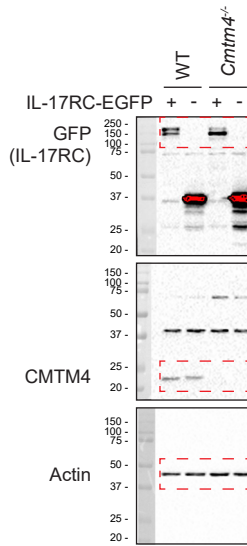

**Fig. 3g**

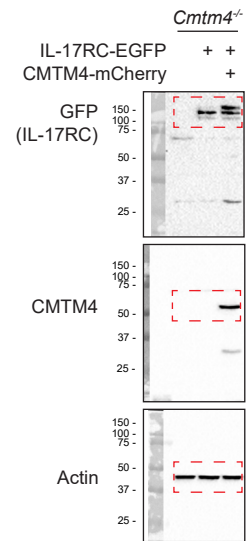

Supplement: 41590_2022_1325_MOESM8_ESM.pdf [file 41590_2022_1325_MOESM8_ESM.pdf]
