# Supplementary material for: CMTM4 is a subunit of the IL-17 receptor and mediates autoimmune pathology
Source: PubMed Central journal article supplement (PMC9663306; doi:10.1038/s41590-022-01325-9), 2022-10-21

Extended Data Fig. 3a

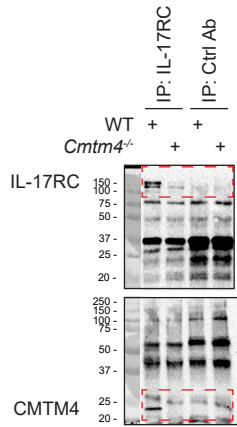

Extended Data Fig. 3b

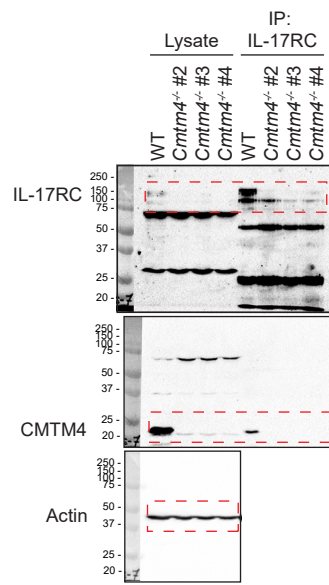

Extended Data Fig. 3c

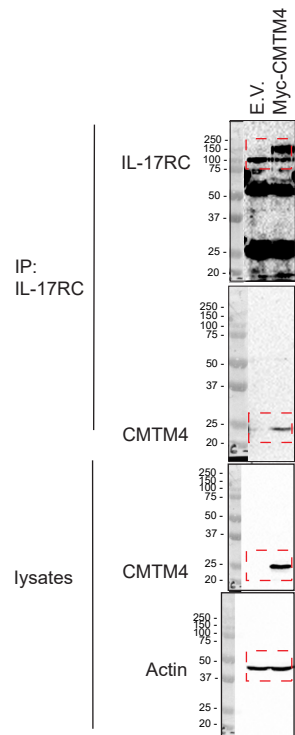

Extended Data Fig. 3d

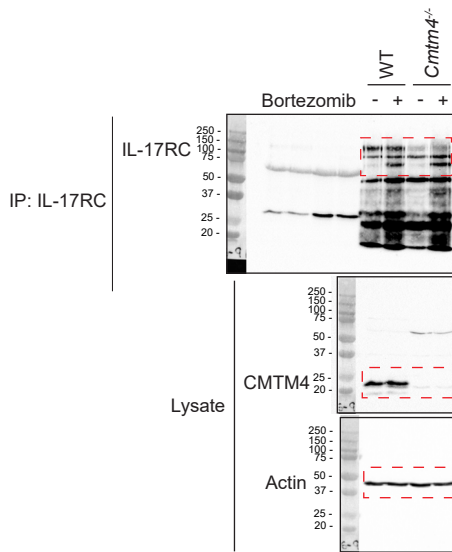

Extended Data Fig. 3e

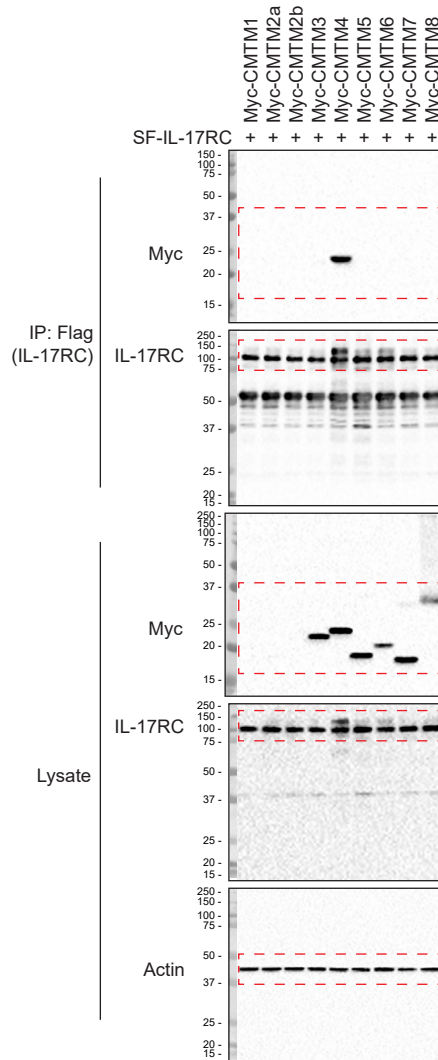

**Extended Data Fig. 3f**

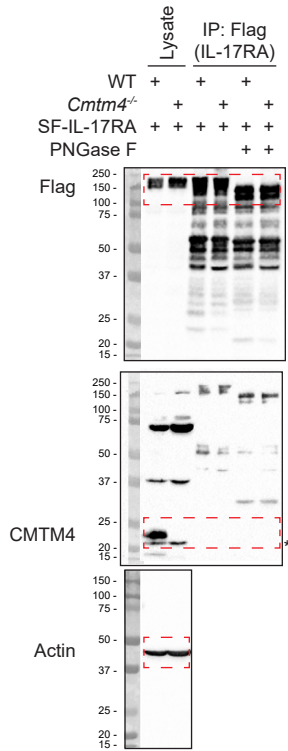

**Extended Data Fig. 3g**

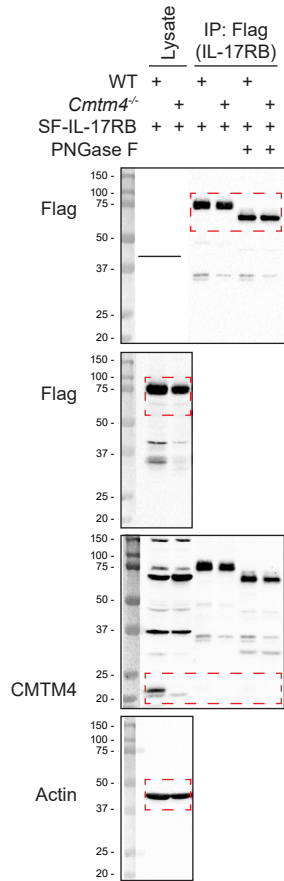

**Extended Data Fig. 3h**

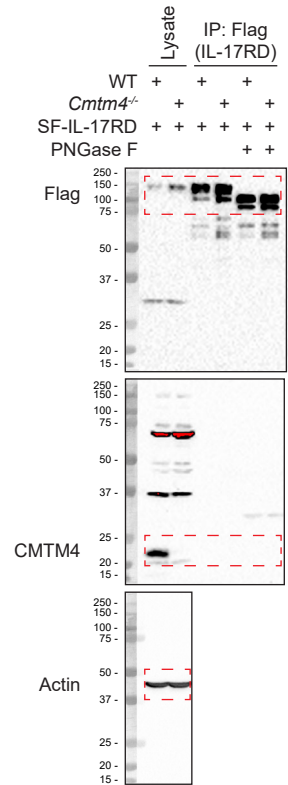

**Extended Data Fig. 3i**

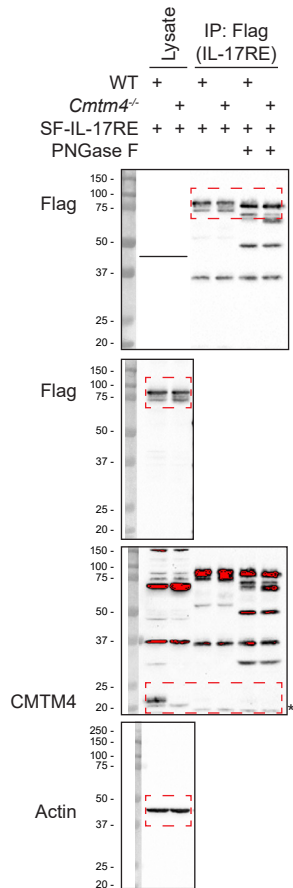

**Extended Data Fig. 3j**

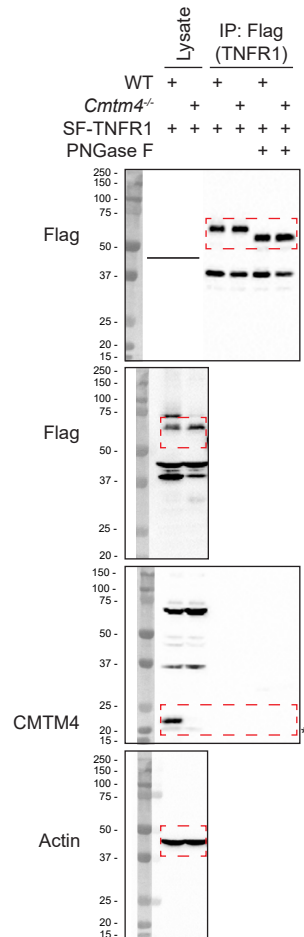

Supplement: 41590_2022_1325_MOESM17_ESM.pdf [file 41590_2022_1325_MOESM17_ESM.pdf]
