# Supplementary material for: CMTM4 is a subunit of the IL-17 receptor and mediates autoimmune pathology
Source: PubMed Central journal article supplement (PMC9663306; doi:10.1038/s41590-022-01325-9), 2022-10-21

**Extended Data Fig. 5a**

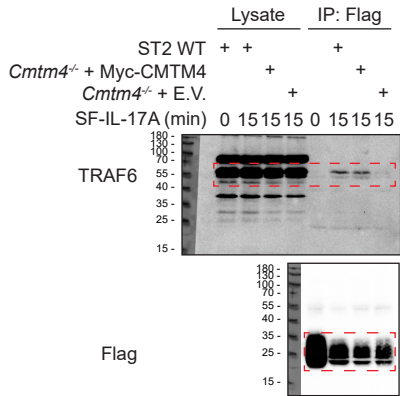

**Extended Data Fig. 5c**

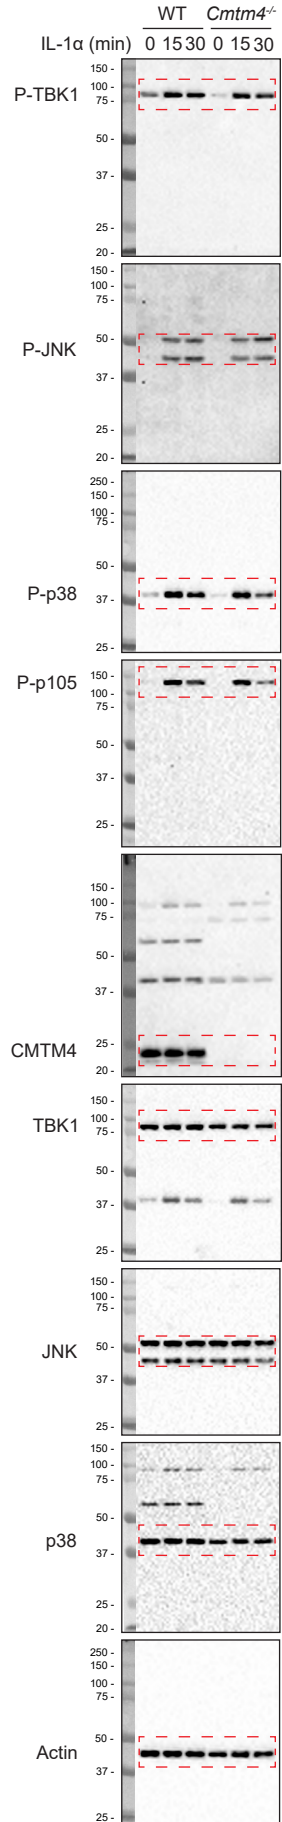

**Extended Data Fig. 5b**

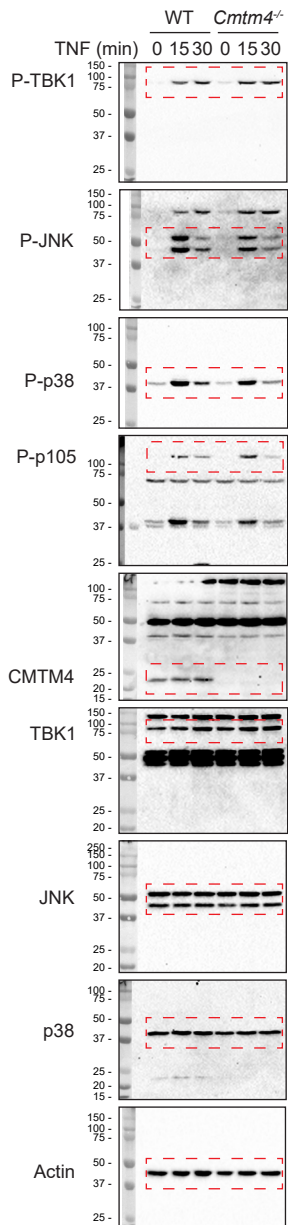

Extended Data Fig. 5d

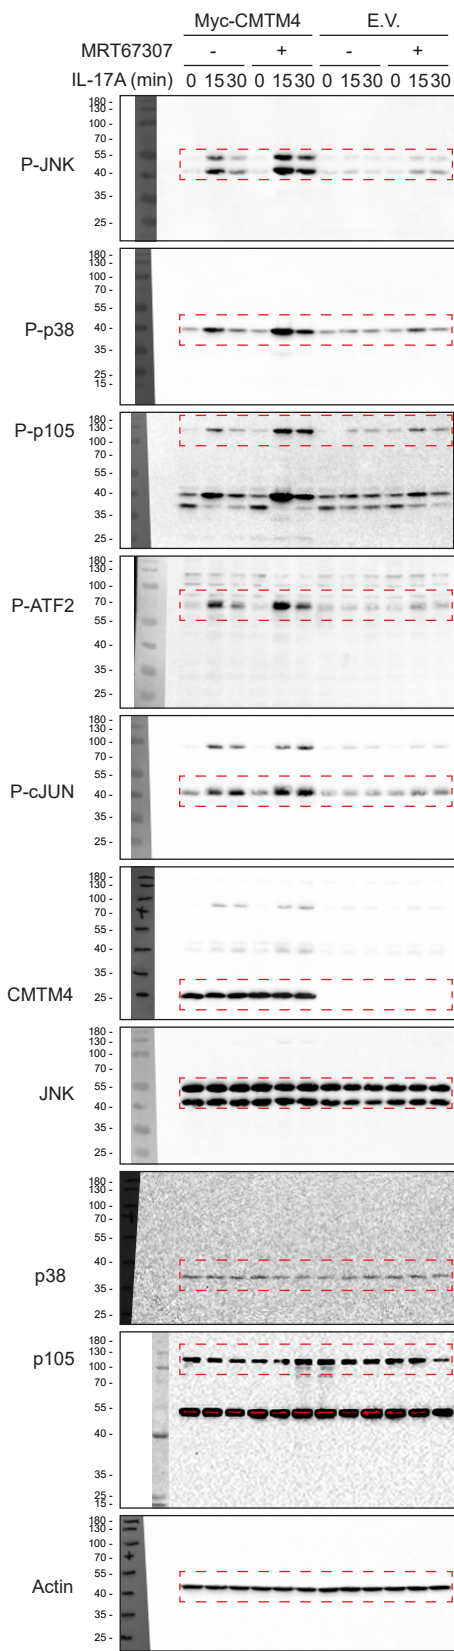

Extended Data Fig. 5f

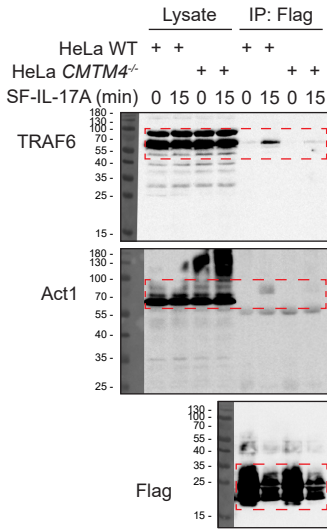

Extended Data Fig. 5g

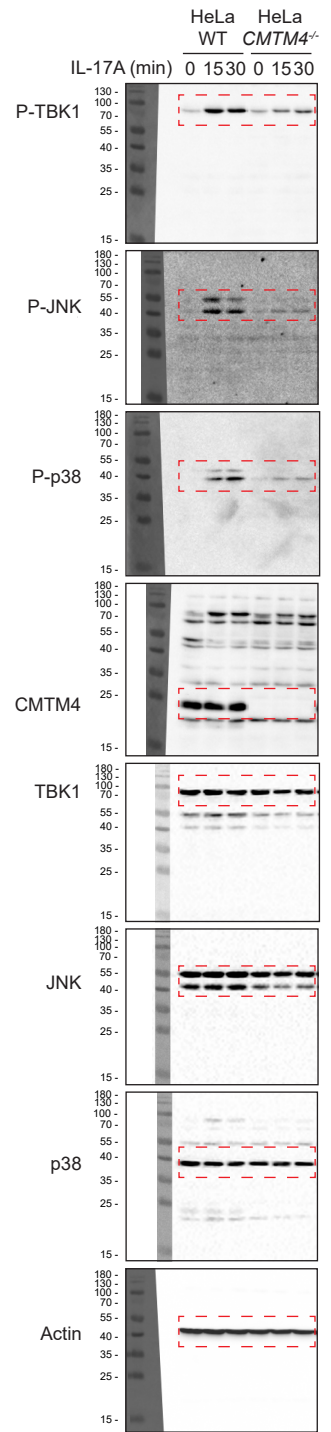

Supplement: 41590_2022_1325_MOESM18_ESM.pdf [file 41590_2022_1325_MOESM18_ESM.pdf]
